# Supplementary material for: A non-academic perspective on the future of lithium-based batteries
Source: PubMed Central journal article supplement (PMC9879955; doi:10.1038/s41467-023-35933-2), 2023-01-26
Supplement: 41467_2023_35933_MOESM1_ESM.pdf [file 41467_2023_35933_MOESM1_ESM.pdf]

## Supplementary Information

### **A non-academic perspective on the future of lithium-based batteries**

James T. Frith<sup>1, \*, †, \*\*</sup> Matthew J. Lacey<sup>2, \*, †</sup> Ulderico Ulissi<sup>3, \*, †, \*\*\*</sup>

1 Volta Energy Technologies, 28365 Davis Pkwy, Warrenville, IL 60555, United States

2 Scania CV AB, 151 87 Södertälje, Sweden

3 Sphere Energy SAS, 250 Bis Boulevard Saint Germain, 75007, Paris, France

\* corresponding authors: [james.frith@volta.vc](mailto:james.frith@volta.vc), [matthew.lacey@scania.com](mailto:matthew.lacey@scania.com), [ulderico.ulissi@live.com](mailto:ulderico.ulissi@live.com)

† these authors contributed equally to the work.

\*\* the author is based in London, UK

\*\*\* the author is based in Birmingham, UK

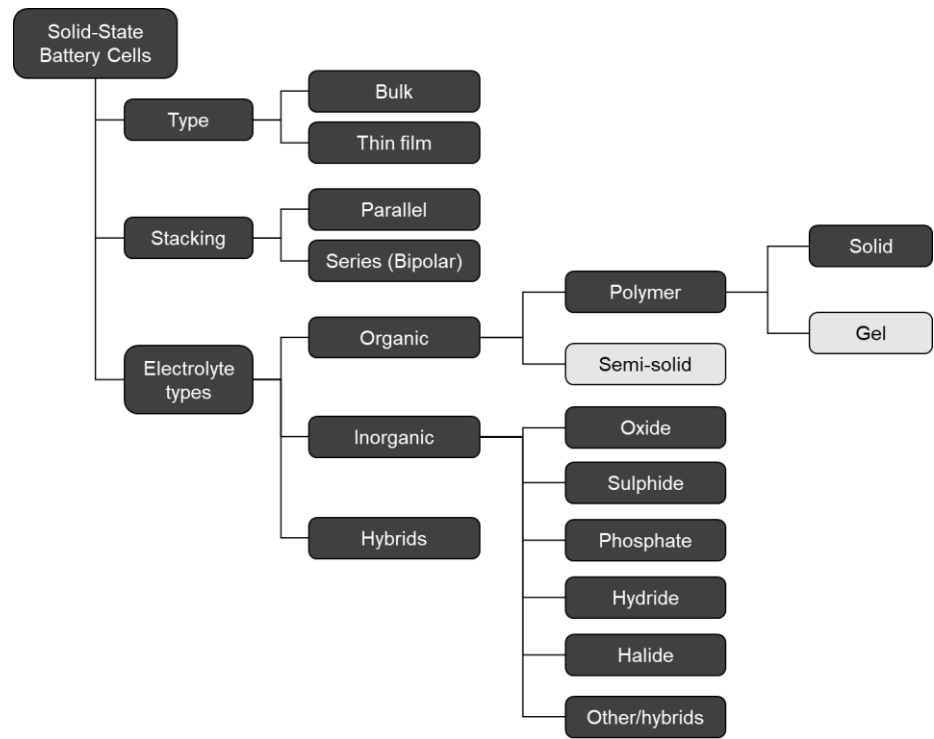

**Supplementary Figure 1: Solid state battery categories.** The categories are based on internal construction (type), stacking configuration and electrolyte chemistry. Semi-solid and gel electrolyte are highlighted (white boxes), as these should be considered as viscous fluids rather than purely solid-state. Stacking refers to the internal battery structure, where parallel stacking is the structure of a conventional, state-of-the-art lithium-ion battery.

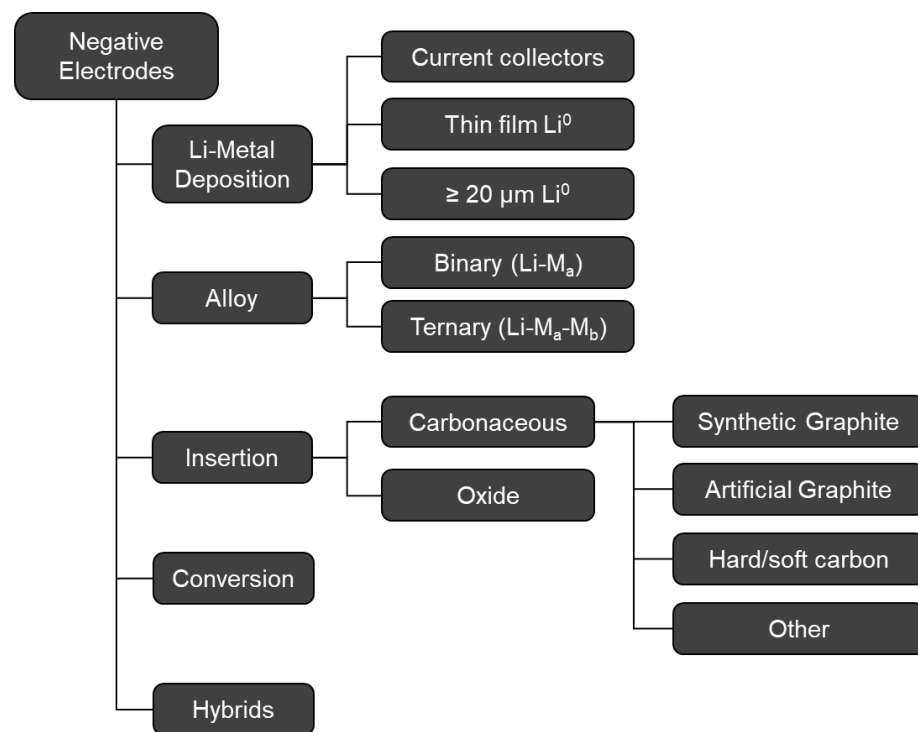

**Supplementary Figure 2: Negative electrode active material categories.** The categories are based on the main lithium reaction mechanisms. In hybrid, we include materials in which the reaction is not dominated by a single mechanism, e.g., conversion-alloy.

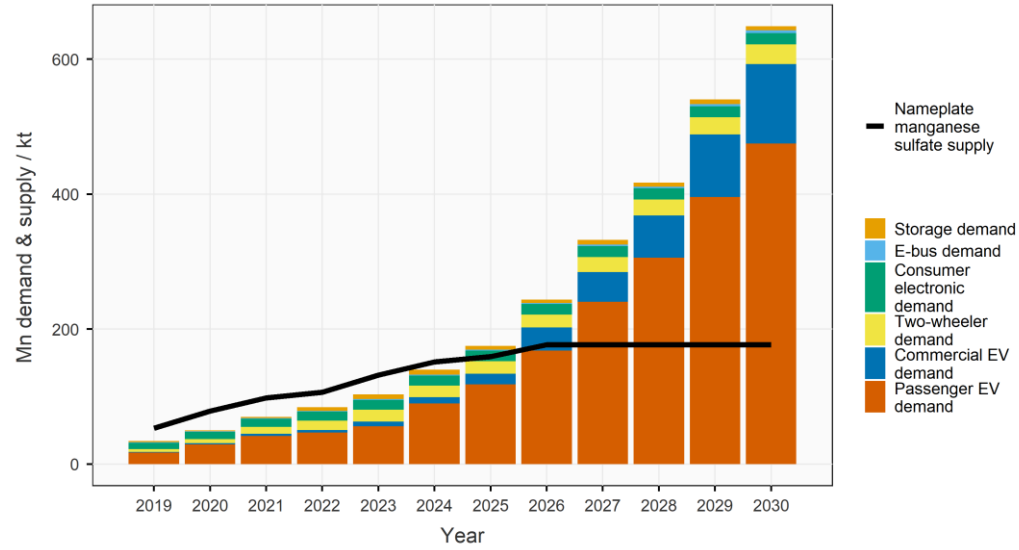

**Supplementary Figure 3: Supply and demand balance for manganese sulfate.** Demand, in kt of manganese sulfate from 2019 (actual) to 2030 (forecasted) is reported per year, as coloured bars, with each colour identifying a specific application, i.e., stationary storage, transportation (E-bus, two-wheeler, commercial EV, passenger EV) and consumer electronics. Supply in kt of manganese sulfate from 2019 (actual) to 2030 (forecasted) is reported as a black line. Data source: BloombergNEF, Global Manganese Outlook 2020-2030.

**Supplementary Table 1:** List of commercially deployed Li-ion battery cells and relevant specifications used to create the energy plot presented in the main text as left panel of Figure 2. Specific energy values are calculated dividing the energy content (Wh) by the mass of the cell (g). Energy density values are calculated dividing the energy (Wh) divided by volume. The latter is calculated as depth\*width\*height for prismatic and pouch cells, and  $\pi*(\text{depth}/2)^2*\text{height}$  for cylindrical cells.

| Name            | Cathode | Anode | Format    | Capacity / Ah | Energy / Wh | Mass of cell / g | Width / mm | Height / mm | Depth / mm | Source                                                                                                                                                                                                                                                                                                                                                                            |
|-----------------|---------|-------|-----------|---------------|-------------|------------------|------------|-------------|------------|-----------------------------------------------------------------------------------------------------------------------------------------------------------------------------------------------------------------------------------------------------------------------------------------------------------------------------------------------------------------------------------|
| CATL 60 Ah      | LFP     | Gr    | Prismatic | 60            | 192         | 1821             | 217        | 135         | 29         | <a href="https://www.indiamart.com/proddetail/catl-type-60ah-3-2v-15000-cycles-22154610991.html">https://www.indiamart.com/proddetail/catl-type-60ah-3-2v-15000-cycles-22154610991.html</a>                                                                                                                                                                                       |
| CATL 161 Ah     | LFP     | Gr    | Prismatic | 161           | 515.2       | 3100             | 280        | 82          | 62         | <a href="https://batteryfinds.com/wp-content/uploads/2021/06/CATL-161Ah-Lithium-Iron-PhosphateLiFePO4-LFP-Battery-Cell-Product-Specification.pdf">https://batteryfinds.com/wp-content/uploads/2021/06/CATL-161Ah-Lithium-Iron-PhosphateLiFePO4-LFP-Battery-Cell-Product-Specification.pdf</a>                                                                                     |
| CATL 302 Ah     | LFP     | Gr    | Prismatic | 302           | 972.4       | 5556             | 207        | 174         | 72         | <a href="https://deligreen.en.made-in-china.com/product/QOzGyZpdfVc/China-Grade-a-Catl-3-2V-302ah-LiFePO4-Cell-300ah-310ah-320ah-Lithium-Iron-Phosphate-Battery-for-Solar-RV-Inverter.html">https://deligreen.en.made-in-china.com/product/QOzGyZpdfVc/China-Grade-a-Catl-3-2V-302ah-LiFePO4-Cell-300ah-310ah-320ah-Lithium-Iron-Phosphate-Battery-for-Solar-RV-Inverter.html</a> |
| ACE 50 Ah       | LFP     | Gr    | Prismatic | 50            | 160         | 860              | 148        | 129         | 26         | <a href="https://www.acebattery.com/products/prismatic-cell-lifepo4.html">https://www.acebattery.com/products/prismatic-cell-lifepo4.html</a>                                                                                                                                                                                                                                     |
| ACE 100 Ah      | LFP     | Gr    | Prismatic | 100           | 320         | 1800             | 173        | 133         | 47         | <a href="https://www.acebattery.com/products/prismatic-cell-lifepo4.html">https://www.acebattery.com/products/prismatic-cell-lifepo4.html</a>                                                                                                                                                                                                                                     |
| ACE 200 Ah      | LFP     | Gr    | Prismatic | 200           | 640         | 4100             | 207        | 173         | 53         | <a href="https://www.acebattery.com/products/prismatic-cell-lifepo4.html">https://www.acebattery.com/products/prismatic-cell-lifepo4.html</a>                                                                                                                                                                                                                                     |
| ACE 277 Ah      | LFP     | Gr    | Prismatic | 277           | 886.4       | 5200             | 207        | 173         | 71         | <a href="https://www.acebattery.com/products/prismatic-cell-lifepo4.html">https://www.acebattery.com/products/prismatic-cell-lifepo4.html</a>                                                                                                                                                                                                                                     |
| Gotion ESS105   | LFP     | Gr    | Prismatic | 105           | 336         | 2030             | 200        | 175         | 27         | <a href="https://www.shanghai-electric.com/group_en/c/2019-08-12/557924.shtml">https://www.shanghai-electric.com/group_en/c/2019-08-12/557924.shtml</a>                                                                                                                                                                                                                           |
| Gotion ESS90    | LFP     | Gr    | Prismatic | 90            | 288         | 1980             | 200        | 175         | 27         | <a href="https://www.shanghai-electric.com/group_en/c/2019-08-12/557924.shtml">https://www.shanghai-electric.com/group_en/c/2019-08-12/557924.shtml</a>                                                                                                                                                                                                                           |
| Gotion ESS96    | LFP     | Gr    | Prismatic | 96            | 307.2       | 2020             | 200        | 175         | 27         | <a href="https://www.shanghai-electric.com/group_en/c/2019-08-12/557924.shtml">https://www.shanghai-electric.com/group_en/c/2019-08-12/557924.shtml</a>                                                                                                                                                                                                                           |
| Gotion ESS100   | LFP     | Gr    | Prismatic | 100           | 320         | 2050             | 200        | 175         | 27         | <a href="https://www.shanghai-electric.com/group_en/c/2019-08-12/557924.shtml">https://www.shanghai-electric.com/group_en/c/2019-08-12/557924.shtml</a>                                                                                                                                                                                                                           |
| Gotion ESS40    | LFP     | Gr    | Prismatic | 40            | 128         | 925              | 148        | 115         | 28         | <a href="https://www.shanghai-electric.com/group_en/c/2019-08-12/557924.shtml">https://www.shanghai-electric.com/group_en/c/2019-08-12/557924.shtml</a>                                                                                                                                                                                                                           |
| Samsung CS1200R | NMC     | Gr    | Prismatic | 123.9         | 456.8       | 2228             | 174        | 125.5       | 45         | <a href="https://www.batemo.de/products/batemo-cell-library/cs1200r/">https://www.batemo.de/products/batemo-cell-library/cs1200r/</a>                                                                                                                                                                                                                                             |
| Lishen 51 Ah    | NMC     | Gr    | Prismatic | 53.1          | 195.8       | 911.4            | 147.7      | 97.5        | 28         | <a href="https://www.batemo.de/products/batemo-cell-library/c-pr51a/">https://www.batemo.de/products/batemo-cell-library/c-pr51a/</a>                                                                                                                                                                                                                                             |
| LG A7           | NMC     | Gr    | Pouch     | 51.1          | 188.7       | 895              | 298        | 153         | 10.6       | <a href="https://www.batemo.de/products/batemo-cell-library/a7/">https://www.batemo.de/products/batemo-cell-library/a7/</a>                                                                                                                                                                                                                                                       |
| LG E63B         | NMC     | Gr    | Pouch     | 61.1          | 225.2       | 887.8            | 310        | 114         | 15         | <a href="https://www.batemo.de/products/batemo-cell-library/e63b/">https://www.batemo.de/products/batemo-cell-library/e63b/</a>                                                                                                                                                                                                                                                   |
| LG E66A         | NMC     | Gr    | Pouch     | 63.5          | 232.2       | 897              | 350        | 104         | 11.7       | <a href="https://www.batemo.de/products/batemo-cell-library/e66a/">https://www.batemo.de/products/batemo-cell-library/e66a/</a>                                                                                                                                                                                                                                                   |
| Samsung 94 Ah   | NMC     | Gr    | Pouch     | 94            | 345.92      | 2010             | 173        | 125         | 45         | <a href="https://pushevs.com/2018/04/05/samsung-sdi-94-ah-battery-cell-full-specifications/">https://pushevs.com/2018/04/05/samsung-sdi-94-ah-battery-cell-full-specifications/</a>                                                                                                                                                                                               |

|                            |        |       |             |             |        |        |       |       |       |                                                                                                                                                                                                                                                                                                                                                                                                                                                                                                                                                                                                                                                                                                                                                                                                                                                                                                                                                                                                                                                                                                                                                                                                                                                 |
|----------------------------|--------|-------|-------------|-------------|--------|--------|-------|-------|-------|-------------------------------------------------------------------------------------------------------------------------------------------------------------------------------------------------------------------------------------------------------------------------------------------------------------------------------------------------------------------------------------------------------------------------------------------------------------------------------------------------------------------------------------------------------------------------------------------------------------------------------------------------------------------------------------------------------------------------------------------------------------------------------------------------------------------------------------------------------------------------------------------------------------------------------------------------------------------------------------------------------------------------------------------------------------------------------------------------------------------------------------------------------------------------------------------------------------------------------------------------|
| Panasonic Tesla Model 3    | NCA    | Gr-Si | Cylindrical | 4.66        | 17.1   | 68.5   | 21    | 70    |       | <a href="https://www.batemo.de/products/batemo-cell-library/tesla-model-3/">https://www.batemo.de/products/batemo-cell-library/tesla-model-3/</a>                                                                                                                                                                                                                                                                                                                                                                                                                                                                                                                                                                                                                                                                                                                                                                                                                                                                                                                                                                                                                                                                                               |
| LG INR21700 M50            | NMC    | Gr-Si | Cylindrical | 5.013774105 | 18.2   | 68     | 21    | 70    |       | <a href="https://www.dnkpower.com/wp-content/uploads/2019/02/LG-INR21700-M50-Datasheet.pdf">https://www.dnkpower.com/wp-content/uploads/2019/02/LG-INR21700-M50-Datasheet.pdf</a>                                                                                                                                                                                                                                                                                                                                                                                                                                                                                                                                                                                                                                                                                                                                                                                                                                                                                                                                                                                                                                                               |
| A123 ANR26650M1B           | LFP    | Gr    | Cylindrical | 2.5         | 8.25   | 70.6   | 26    | 65    |       | <a href="https://a123batteries.com/anr26650m1-b-lithiumwerks-nanophosphate-3-3v-2-5ah-lithium-iron-phosphate-battery/">https://a123batteries.com/anr26650m1-b-lithiumwerks-nanophosphate-3-3v-2-5ah-lithium-iron-phosphate-battery/</a>                                                                                                                                                                                                                                                                                                                                                                                                                                                                                                                                                                                                                                                                                                                                                                                                                                                                                                                                                                                                         |
| A123 APR18650M1B           | LFP    | Gr    | Cylindrical | 1.1         | 3.63   | 39     | 18    | 65    |       | <a href="https://www.batteryspace.com/prod-specs/6612-APR18650M1B.pdf">https://www.batteryspace.com/prod-specs/6612-APR18650M1B.pdf</a>                                                                                                                                                                                                                                                                                                                                                                                                                                                                                                                                                                                                                                                                                                                                                                                                                                                                                                                                                                                                                                                                                                         |
| Oxis High Power            | Sulfur | Li    | Pouch       | 19          | 40.85  | 141    | 151   | 116   | 10.7  | <a href="https://45uevg34gwlltnbsf2plyua1-wpengine.netdna-ssl.com/wp-content/uploads/2019/07/OXIS-Li-S-Ultra-Light-Cell-spec-sheet-v4.2.pdf">https://45uevg34gwlltnbsf2plyua1-wpengine.netdna-ssl.com/wp-content/uploads/2019/07/OXIS-Li-S-Ultra-Light-Cell-spec-sheet-v4.2.pdf</a>                                                                                                                                                                                                                                                                                                                                                                                                                                                                                                                                                                                                                                                                                                                                                                                                                                                                                                                                                             |
| Oxis High Energy           | Sulfur | Li    | Pouch       | 14.7        | 31.605 | 85     | 145   | 78    | 10    | <a href="https://45uevg34gwlltnbsf2plyua1-wpengine.netdna-ssl.com/wp-content/uploads/2019/07/OXIS-Li-S-Ultra-Light-Cell-spec-sheet-v4.2.pdf">https://45uevg34gwlltnbsf2plyua1-wpengine.netdna-ssl.com/wp-content/uploads/2019/07/OXIS-Li-S-Ultra-Light-Cell-spec-sheet-v4.2.pdf</a>                                                                                                                                                                                                                                                                                                                                                                                                                                                                                                                                                                                                                                                                                                                                                                                                                                                                                                                                                             |
| Zenlabs 12 Ah              | NMC    | SiOx  | Pouch       | 12.3        | 42.558 | 133    | 145   | 64    | 6.7   | <a href="https://www.energy.gov/sites/prod/files/2020/05/f75/bat247_lopez_2020_p_5.11.20_725PM_LR.pdf">https://www.energy.gov/sites/prod/files/2020/05/f75/bat247_lopez_2020_p_5.11.20_725PM_LR.pdf</a>                                                                                                                                                                                                                                                                                                                                                                                                                                                                                                                                                                                                                                                                                                                                                                                                                                                                                                                                                                                                                                         |
| Zenlabs 51 Ah              | NMC    | SiOx  | Pouch       | 51          | 176.46 | 592    | 302   | 102   | 10    | <a href="https://static1.squarespace.com/static/59dbcd906f4ca35190c9aeb4/t/5cac327223d25a000188813b/1554788979381/EPS+Range.pdf">https://static1.squarespace.com/static/59dbcd906f4ca35190c9aeb4/t/5cac327223d25a000188813b/1554788979381/EPS+Range.pdf</a>                                                                                                                                                                                                                                                                                                                                                                                                                                                                                                                                                                                                                                                                                                                                                                                                                                                                                                                                                                                     |
| SVOLT NMx 115 Ah           | NMx    | Gr    | Prismatic   | 115         | 430    | 1760   | 220   | 102.5 | 33.4  | <a href="https://insideevs.com/news/483181/svolt-cobalt-free-nmx-cell-available-order/">https://insideevs.com/news/483181/svolt-cobalt-free-nmx-cell-available-order/</a>                                                                                                                                                                                                                                                                                                                                                                                                                                                                                                                                                                                                                                                                                                                                                                                                                                                                                                                                                                                                                                                                       |
| Cuberg HP-5P               | NMC    | Li    | Pouch       | 5.1         | 19.635 | 52.9   | 80    | 60    | 6.2   | <a href="https://www.datocms-assets.com/40252/1614987038-doerresultsforcuberg.pdf">https://www.datocms-assets.com/40252/1614987038-doerresultsforcuberg.pdf</a>                                                                                                                                                                                                                                                                                                                                                                                                                                                                                                                                                                                                                                                                                                                                                                                                                                                                                                                                                                                                                                                                                 |
| Cuberg HV                  | NMC    | Li    | Pouch       | 5.1         | 19.4   | 48.1   | 77    | 59    | 5.3   | <a href="https://s3.us-west-2.amazonaws.com/secure.notion-static.com/e6ea326b-48ae-4b47-a0ed-0f34a6884ec1/Screen_Shot_2022-01-11_at_11.26.05.png?X-Amz-Algorithm=AWS4-HMAC-SHA256&amp;X-Amz-Content-Sha256=UNSIGNED-PAYLOAD&amp;X-Amz-Credential=AKIAT73L2G45E1PT3X45%2F20220111%2Fus-west-2%2Ffs3%2Faws4_request&amp;X-Amz-Date=20220111T110149Z&amp;X-Amz-Expires=86400&amp;X-Amz-Signature=d87d4aa8142f9ffeeae8d6ba285cea081bf79afaa07bf3521bec8ff8e5426f2&amp;X-Amz-SignedHeaders=host&amp;response-content-disposition=filename%20%3D%22Screen%2520Shot%25202022-01-11%2520at%252011.26.05.png%22&amp;x-id=GetObject">https://s3.us-west-2.amazonaws.com/secure.notion-static.com/e6ea326b-48ae-4b47-a0ed-0f34a6884ec1/Screen_Shot_2022-01-11_at_11.26.05.png?X-Amz-Algorithm=AWS4-HMAC-SHA256&amp;X-Amz-Content-Sha256=UNSIGNED-PAYLOAD&amp;X-Amz-Credential=AKIAT73L2G45E1PT3X45%2F20220111%2Fus-west-2%2Ffs3%2Faws4_request&amp;X-Amz-Date=20220111T110149Z&amp;X-Amz-Expires=86400&amp;X-Amz-Signature=d87d4aa8142f9ffeeae8d6ba285cea081bf79afaa07bf3521bec8ff8e5426f2&amp;X-Amz-SignedHeaders=host&amp;response-content-disposition=filename%20%3D%22Screen%2520Shot%25202022-01-11%2520at%252011.26.05.png%22&amp;x-id=GetObject</a> |
| Sion Power Licerion        | NMC    | Li    | Pouch       | 20          | 76.4   | 154    | 100   | 100   | 10    | <a href="https://sionpower.com/products/">https://sionpower.com/products/</a>                                                                                                                                                                                                                                                                                                                                                                                                                                                                                                                                                                                                                                                                                                                                                                                                                                                                                                                                                                                                                                                                                                                                                                   |
| Enovix EX1-341729A         | NMC    | Si    | Pouch       | 0.337       | 1.22   | 4.71   | 28.72 | 17.34 | 3.39  | <a href="https://assets.website-files.com/6023ee57b22bf2f0c312206d/602d3e2d1b41897a1bb7c1c1_Enovix_Wearable_Cell_Data_Sheets.pdf">https://assets.website-files.com/6023ee57b22bf2f0c312206d/602d3e2d1b41897a1bb7c1c1_Enovix_Wearable_Cell_Data_Sheets.pdf</a>                                                                                                                                                                                                                                                                                                                                                                                                                                                                                                                                                                                                                                                                                                                                                                                                                                                                                                                                                                                   |
| Prologium PLCB_36D3L8A AJA | NMC    | Li    | Pouch       | 8.3         | 31.125 | 115.28 | 133   | 218   | 3.7   | <a href="https://docplayer.net/95626946-Prologium-lithium-ceramic-battery-profile.html">https://docplayer.net/95626946-Prologium-lithium-ceramic-battery-profile.html</a>                                                                                                                                                                                                                                                                                                                                                                                                                                                                                                                                                                                                                                                                                                                                                                                                                                                                                                                                                                                                                                                                       |
| Solid Energy Hermes        | NMC    | Li    | Pouch       | 3.4         | 13     | 29     | 66    | 37    | 6.35  | <a href="http://assets.solidenergysystems.com/wp-content/uploads/2017/09/08171937/Hermes_Spec_Sheet1.pdf">http://assets.solidenergysystems.com/wp-content/uploads/2017/09/08171937/Hermes_Spec_Sheet1.pdf</a>                                                                                                                                                                                                                                                                                                                                                                                                                                                                                                                                                                                                                                                                                                                                                                                                                                                                                                                                                                                                                                   |
| LG E61V                    | NMC    | Gr    | Pouch       | 61.1        | 224.7  | 874.7  | 355   | 110   | 11.39 | <a href="https://www.batemo.de/products/batemo-cell-library/e61v/">https://www.batemo.de/products/batemo-cell-library/e61v/</a>                                                                                                                                                                                                                                                                                                                                                                                                                                                                                                                                                                                                                                                                                                                                                                                                                                                                                                                                                                                                                                                                                                                 |
| CALB LI48N50B              | NMC    | Gr    | Prismatic   | 51.3        | 191.9  | 855.7  | 148   | 97.5  | 26.5  | <a href="https://www.batemo.de/products/batemo-cell-library/li48n50b/">https://www.batemo.de/products/batemo-cell-library/li48n50b/</a>                                                                                                                                                                                                                                                                                                                                                                                                                                                                                                                                                                                                                                                                                                                                                                                                                                                                                                                                                                                                                                                                                                         |
| Samsung BMW530e            | NMC    | Gr    | Prismatic   | 29.5        | 109.4  | 702    | 173   | 85    | 22    | <a href="https://www.batemo.de/products/batemo-cell-library/bmw-530e/">https://www.batemo.de/products/batemo-cell-library/bmw-530e/</a>                                                                                                                                                                                                                                                                                                                                                                                                                                                                                                                                                                                                                                                                                                                                                                                                                                                                                                                                                                                                                                                                                                         |
| SAPB VW eGolf              | NMC    | Gr    | Prismatic   | 39.9        | 148    | 802.6  | 148   | 90    | 26    | <a href="https://www.batemo.de/products/batemo-cell-library/vw-egolf/">https://www.batemo.de/products/batemo-cell-library/vw-egolf/</a>                                                                                                                                                                                                                                                                                                                                                                                                                                                                                                                                                                                                                                                                                                                                                                                                                                                                                                                                                                                                                                                                                                         |

|                                       |        |             |             |       |          |      |       |       |      |                                                                                                                                                                                                                                                                                   |
|---------------------------------------|--------|-------------|-------------|-------|----------|------|-------|-------|------|-----------------------------------------------------------------------------------------------------------------------------------------------------------------------------------------------------------------------------------------------------------------------------------|
| Panasonic NCR2170-M                   | NCA    | Gr-Si       | Cylindrical | 4.98  | 18.1     | 66.9 | 20.9  | 70.02 |      | <a href="https://www.batemo.de/products/batemo-cell-library/ncr2170-m/">https://www.batemo.de/products/batemo-cell-library/ncr2170-m/</a>                                                                                                                                         |
| Panasonic NCR18650-G                  | NCA    | Gr-Si       | Cylindrical | 3.34  | 12.3     | 46.4 | 18.25 | 65.1  |      | <a href="https://www.batemo.de/products/batemo-cell-library/ncr18650-g/">https://www.batemo.de/products/batemo-cell-library/ncr18650-g/</a>                                                                                                                                       |
| AMTE Ultra Safe                       | NaMO2  | Hard carbon | Pouch       | 30    | 93       | 655  | 228   | 167   | 11.6 | <a href="https://amtepower.com/wp-content/uploads/2020/05/ULTRA-Safe-AMTE-A5-leaflet.pdf">https://amtepower.com/wp-content/uploads/2020/05/ULTRA-Safe-AMTE-A5-leaflet.pdf</a>                                                                                                     |
| HiNa NaCR26650                        | NaMO2  | Soft carbon | Cylindrical | 2.3   | 7.36     | 50.1 | 26    | 65    |      | <a href="http://cpl.iphy.ac.cn/Y2021/V38/I7/076501#1">http://cpl.iphy.ac.cn/Y2021/V38/I7/076501#1</a>                                                                                                                                                                             |
| Toshiba SCiB High Power 2.9 Ah        | NMC    | LTO         | Prismatic   | 2.9   | 6.96     | 150  | 63    | 97    | 14   | <a href="https://www.global.toshiba/ww/products-solutions/battery/scib/product/cell.html">https://www.global.toshiba/ww/products-solutions/battery/scib/product/cell.html</a>                                                                                                     |
| Toshiba SCiB High Power 10 Ah         | NMC    | LTO         | Prismatic   | 10    | 24       | 510  | 116   | 106   | 22   | <a href="https://www.global.toshiba/ww/products-solutions/battery/scib/product/cell.html">https://www.global.toshiba/ww/products-solutions/battery/scib/product/cell.html</a>                                                                                                     |
| Toshiba SCiB High Energy 20 Ah        | NMC    | LTO         | Prismatic   | 20    | 46       | 515  | 116   | 106   | 22   | <a href="https://www.global.toshiba/ww/products-solutions/battery/scib/product/cell.html">https://www.global.toshiba/ww/products-solutions/battery/scib/product/cell.html</a>                                                                                                     |
| Toshiba SCiB High Energy 23 Ah        | NMC    | LTO         | Prismatic   | 23    | 52.9     | 550  | 116   | 106   | 22   | <a href="https://www.global.toshiba/ww/products-solutions/battery/scib/product/cell.html">https://www.global.toshiba/ww/products-solutions/battery/scib/product/cell.html</a>                                                                                                     |
| Sion Power Li-S                       | Sulfur | Li          | Prismatic   | 2.8   | 5.805    | 16   | 37    | 55    | 11   | <a href="https://iba2013.icmab.es/images/files/Wednesday/Morning/Yuriy_Mikhaylik.pdf">https://iba2013.icmab.es/images/files/Wednesday/Morning/Yuriy_Mikhaylik.pdf</a>                                                                                                             |
| iPhone X                              | LCO    | Gr          | Prismatic   | 2.716 | 10.34796 | 40   | 34    | 123.4 | 4    | <a href="https://www.nasa.gov/sites/default/files/atoms/files/beyond_li-ion_battery_high_energy_and_power_cells_market_for_conferences.pdf">https://www.nasa.gov/sites/default/files/atoms/files/beyond_li-ion_battery_high_energy_and_power_cells_market_for_conferences.pdf</a> |
| Samsung 3 Ah pouch                    | LCO    | Gr          | Pouch       | 3     | 11.55    | 42.7 | 77    | 40    | 5    | <a href="https://www.nasa.gov/sites/default/files/atoms/files/beyond_li-ion_battery_high_energy_and_power_cells_market_for_conferences.pdf">https://www.nasa.gov/sites/default/files/atoms/files/beyond_li-ion_battery_high_energy_and_power_cells_market_for_conferences.pdf</a> |
| Smartphone 3.5 Ah pouch               | LCO    | Gr          | Pouch       | 3.5   | 13.48    | 51.3 | 80    | 45    | 5    | <a href="https://www.nasa.gov/sites/default/files/atoms/files/beyond_li-ion_battery_high_energy_and_power_cells_market_for_conferences.pdf">https://www.nasa.gov/sites/default/files/atoms/files/beyond_li-ion_battery_high_energy_and_power_cells_market_for_conferences.pdf</a> |
| Amprius HAPS                          | NMC    | Si          | Pouch       | 3.8   | 13.9     | 33.1 | 50    | 55    | 4.5  | <a href="https://www1.grc.nasa.gov/wp-content/uploads/5.-Amprius.pdf">https://www1.grc.nasa.gov/wp-content/uploads/5.-Amprius.pdf</a>                                                                                                                                             |
| Amprius Drones HP                     | NMC    | Si          | Pouch       | 2.8   | 10.1     | 27.8 | 50    | 55    | 4.2  | <a href="https://www1.grc.nasa.gov/wp-content/uploads/5.-Amprius.pdf">https://www1.grc.nasa.gov/wp-content/uploads/5.-Amprius.pdf</a>                                                                                                                                             |
| Amprius Drones LE                     | NMC    | Si          | Pouch       | 3.6   | 13.2     | 31.7 | 50    | 55    | 4.6  | <a href="https://www1.grc.nasa.gov/wp-content/uploads/5.-Amprius.pdf">https://www1.grc.nasa.gov/wp-content/uploads/5.-Amprius.pdf</a>                                                                                                                                             |
| Amprius High Capacity                 | NMC    | Si          | Pouch       | 8.1   | 29.3     | 68.1 | 105   | 50    | 4.5  | <a href="https://www1.grc.nasa.gov/wp-content/uploads/5.-Amprius.pdf">https://www1.grc.nasa.gov/wp-content/uploads/5.-Amprius.pdf</a>                                                                                                                                             |
| Amprius Army Wearable                 | NMC    | Si          | Pouch       | 5.4   | 21       | 49.5 | 54    | 64    | 5.4  | <a href="https://www1.grc.nasa.gov/wp-content/uploads/5.-Amprius.pdf">https://www1.grc.nasa.gov/wp-content/uploads/5.-Amprius.pdf</a>                                                                                                                                             |
| KeepPower ICR18650-300PCM-R Protected | LCO    | Gr          | Cylindrical | 3     | 11.1     | 48   | 19.3  | 69.5  |      | <a href="https://www.tme.eu/Document/dcf728d9ce7d6edbd8fbfdd0321153d7/ACCU-18650-15APCB.pdf">https://www.tme.eu/Document/dcf728d9ce7d6edbd8fbfdd0321153d7/ACCU-18650-15APCB.pdf</a>                                                                                               |
| Samsung ICR18650-29E                  | LCO    | Gr          | Cylindrical | 2.9   | 10.73    | 44.5 | 18.4  | 65    |      | <a href="https://batterybuilding.en.made-in-china.com/product/VvwQnMTHgIkR/China-1cr18650-29e-3-7V-2900mAh-18650-Lithium-Battery.html">https://batterybuilding.en.made-in-china.com/product/VvwQnMTHgIkR/China-1cr18650-29e-3-7V-2900mAh-18650-Lithium-Battery.html</a>           |

|                                  |     |    |             |      |        |      |       |      |                                                                                                                                                                                                                       |
|----------------------------------|-----|----|-------------|------|--------|------|-------|------|-----------------------------------------------------------------------------------------------------------------------------------------------------------------------------------------------------------------------|
| Samsung<br>ICR18650-26J          | LCO | Gr | Cylindrical | 2.6  | 9.438  | 45   | 18.4  | 65   | <a href="https://datasheetspdf.com/pdf-file/1402663/Samsung/ICR18650-26J/1">https://datasheetspdf.com/pdf-file/1402663/Samsung/ICR18650-26J/1</a>                                                                     |
| Molicel IMR-<br>18650E           | LMO | Gr | Cylindrical | 1.4  | 5.32   | 42   | 18.24 | 65   | <a href="https://datasheetspdf.com/pdf/821868/E-ONEMOLIENERGY/IMR-18650E/1">https://datasheetspdf.com/pdf/821868/E-ONEMOLIENERGY/IMR-18650E/1</a>                                                                     |
| Nitecore<br>IMR18650<br>3100 mAh | LMO | Gr | Cylindrical | 3.1  | 11.47  | 45.8 | 18.4  | 65   | <a href="https://www.batteryjunction.com/nitecore-imr18650-3100-35a-battery.html">https://www.batteryjunction.com/nitecore-imr18650-3100-35a-battery.html</a>                                                         |
| Nitecore<br>IMR18650<br>2600 mAh | LMO | Gr | Cylindrical | 2.6  | 9.62   | 44.1 | 18.2  | 65.2 | <a href="https://files.batteryjunction.com/frontend/files/nitecore/msds/NITECORE-IMR18650-2600-40-MSDS.pdf">https://files.batteryjunction.com/frontend/files/nitecore/msds/NITECORE-IMR18650-2600-40-MSDS.pdf</a>     |
| Nitecore<br>IMR18650<br>2100 mAh | LMO | Gr | Cylindrical | 2.1  | 7.77   | 42.7 | 18.3  | 65.1 | <a href="https://sep.yimg.com/ty/cdn/theshorelinemarket/NITECORE-IMR18650-2100-30-MSDS.pdf?t=1643083619&amp;">https://sep.yimg.com/ty/cdn/theshorelinemarket/NITECORE-IMR18650-2100-30-MSDS.pdf?t=1643083619&amp;</a> |
| Panasonic<br>NCR18650            | NCA | Gr | Cylindrical | 2.75 | 9.9825 | 46.5 | 18.5  | 65.3 | <a href="https://www.omnitron.cz/_dokumenty/792019122953866/ncr-18650.pdf">https://www.omnitron.cz/_dokumenty/792019122953866/ncr-18650.pdf</a>                                                                       |



## Supplementary Note 1: Calculations of theoretical specific energy and energy density

We here consider two cases,  $\text{LiNi}_{0.9}\text{Co}_{0.05}\text{Al}_{0.05}\text{O}_2$  (NCA) vs a graphite-silicon composite in small cylindrical cell format (approximately corresponding to concepts used by companies such as Tesla), and LFP/Gr in CTP concept (as demonstrated by companies such as BYD and CATL).

Theoretical maximum specific energy and energy density

For the NCA/Gr-SiOx, we assume that the anode is 96.5% wt% Gr ( $\text{C}_6$ ) and 3.5% Si wt% active material, and only graphite for the LFP case. We use the following relative molecular masses:

$$M_r(\text{NCA}) = 96.05 \text{ g mol}^{-1}$$

$$M_r(\text{LFP}) = 157.8 \text{ g mol}^{-1}$$

$$M_r(\text{C}_6) = 72.066 \text{ g mol}^{-1}$$

$$M_r(\text{Si}) = 28.086 \text{ g mol}^{-1}$$

Using the formula  $Q = \frac{1}{3.6} \cdot \frac{nF}{M_r}$  we obtain the following theoretical capacities in  $\text{Ah kg}^{-1}$ , where for Si,  $n = 15/4$  (assuming final stoichiometry of  $\text{Li}_{15}\text{Si}_4$ ) and  $n = 1$  for all others:

$$Q_{\text{NCA}} = 279.1 \text{ Ah kg}^{-1}$$

$$Q_{\text{LFP}} = 169.8 \text{ Ah kg}^{-1}$$

$$Q_{\text{Gr}} = 371.9 \text{ Ah kg}^{-1}$$

$$Q_{\text{Si}} = 3578.5 \text{ Ah kg}^{-1}$$

The theoretical specific capacity on materials level for a pair of electrodes can be calculated for these two cases as:

$$\frac{1}{Q_{\text{total}}} = \frac{1}{Q_{\text{cathode}}} + \frac{1}{Q_{\text{anode}}}$$

For the NCA/Gr-SiOx case we have:

$$Q_{\text{NCA,GrSiOx}} = \frac{1}{\frac{1}{279.1} + \frac{1}{0.965 \cdot 371.9 + 0.035 \cdot 3578.5}} = 177.0 \text{ Ah kg}^{-1}$$

and for LFP:

$$Q_{\text{LFP,Gr}} = \frac{1}{\frac{1}{169.8} + \frac{1}{371.9}} = 116.6 \text{ Ah kg}^{-1}$$

To calculate energy density we can multiply the energy density by the nominal voltage. For NCA, in practice only 70-75% of the theoretical capacity is accessible in the potential range 3.5 – 4.2 V vs Li/Li<sup>+</sup>, with a nominal voltage of ~3.6~3.7 V for the full cell. If we assume a linear extrapolation of voltage up to the theoretical capacity of the material, we can assume for this case that the maximum nominal cell voltage where all of the NCA capacity could be accessed could lie in the range 3.9-4.0 V.

On this basis the theoretical energy density can therefore be estimated as:

$$W_{NCA/GrSiOx} = Q_{NCA/GrSiOx} \cdot 3.95 \pm 0.05 = 699 \pm 9 \text{ Wh kg}^{-1}$$

and for LFP the cell voltage is constant and approx. 3.2 V:

$$W_{LFP/Gr} = Q_{LFP/GrSiOx} \cdot 3.2 = 373 \text{ Wh kg}^{-1}$$

To calculate volumetric energies we can assume the following bulk densities of the materials:

$$\rho_{NCA} = 4.85 \text{ kg L}^{-1}$$

$$\rho_{LFP} = 3.45 \text{ kg L}^{-1}$$

$$\rho_{Gr} = 2.24 \text{ kg L}^{-1}$$

$$\rho_{Si} = 2.33 \text{ kg L}^{-1}$$

We can calculate the volumetric capacity for each material by multiplying the specific capacity by the density:

$$Q_{vol,NCA/GrSiOx} = \frac{1}{\frac{1}{279.1 * 4.85} + \frac{1}{(0.965 * 371.9 * 2.24) + (0.035 * 3579.1 * 2.33)}} = 605.6 \text{ Ah L}^{-1}$$

Dividing this by the specific capacity obtained earlier (177 Ah kg<sup>-1</sup>) gives an average density for the active materials (in capacity-balanced quantities) of 3.42 kg L<sup>-1</sup>. For LFP the corresponding charge density is:

$$Q_{vol,LFP/Gr} = \frac{1}{\frac{1}{169.8 * 3.45} + \frac{1}{371.9 * 2.24}} = 343.9 \text{ Ah L}^{-1}$$

which similarly gives an average material density of 2.95 kg L<sup>-1</sup>.

Multiplying these densities by the theoretical specific energies obtained previously we arrive at theoretical energy densities of 2391 ± 31 Wh L<sup>-1</sup> for NCA/Gr-SiOx and 1100 Wh L<sup>-1</sup> for LFP/Gr.

Reversible capacities on materials level

We can assume the following *reversible* capacities (i.e., the specific charge which can in practice be reversibly accessed over multiple charge/discharge cycles) for the following materials:

NCA:  $\sim 200 \text{ mAh g}^{-1}$

Graphite:  $\sim 350 \text{ mAh g}^{-1}$

Silicon:  $\sim 2000 \text{ mAh g}^{-1}$

LFP:  $\sim 160 \text{ mAh g}^{-1}$

Assuming  $n/p = 1$ , the total specific capacity on materials level can be calculated for these two cases as:

$$\frac{1}{Q_{total}} = \frac{1}{Q_{cathode}} + \frac{1}{Q_{anode}}$$

So for NCA:

$$Q_{NCA,GrSiOx} = \frac{1}{\frac{1}{200} + \frac{1}{0.965 \cdot 350} + \frac{1}{0.035 \cdot 2000}} = 134.2 \text{ mAh g}^{-1}$$

and for LFP:

$$Q_{LFP,Gr} = \frac{1}{\frac{1}{160} + \frac{1}{350}} = 109.8 \text{ mAh g}^{-1}$$

Taking typical cell voltages of 3.63 V and 3.2 V for NCA and LFP cells respectively, we arrive at “reversible” capacities on the materials level of  $530 \text{ Wh kg}^{-1}$  for NCA/Gr-SiOx and  $351 \text{ Wh kg}^{-1}$  for LFP/Gr. Following the previous calculations to determine a reversible volumetric capacity:

$$Q_{vol,NCA/GrSiOx} = \frac{1}{\frac{1}{200 \cdot 4.85} + \frac{1}{(0.965 \cdot 350 \cdot 2.24)} + \frac{1}{(0.035 \cdot 200 \cdot 2.33)}} = 472.1 \text{ Ah L}^{-1}$$

$$Q_{vol,LFP/Gr} = \frac{1}{\frac{1}{160 \cdot 3.45} + \frac{1}{350 \cdot 2.24}} = 323.9 \text{ Ah L}^{-1}$$

From which we similarly arrive at effective densities of  $3.52 \text{ kg L}^{-1}$  and  $2.95 \text{ kg L}^{-1}$  for NCA/Gr-SiOx and LFP/Gr respectively, and subsequently  $1866 \text{ Wh L}^{-1}$  and  $1035 \text{ Wh L}^{-1}$  for LFP/Gr.

We consider the following ranges of cell level and pack level energy densities reasonable for each concept, on the basis of commercially available products:

NCA/GrSiOx, small cylindrical:  $245\text{-}270 \text{ Wh kg}^{-1}$ ,  $650\text{-}700 \text{ Wh L}^{-1}$  (cell level);  $155\text{-}175 \text{ Wh kg}^{-1}$ ,  $245\text{-}290 \text{ Wh L}^{-1}$  (pack level)

LFP/Gr, cell-to-pack:  $160\text{-}200 \text{ Wh kg}^{-1}$ ,  $350\text{-}400 \text{ Wh L}^{-1}$  (cell level);  $130\text{-}150 \text{ Wh kg}^{-1}$ ,  $210\text{-}240 \text{ Wh L}^{-1}$  (pack level)

We also assume that a typical usable state-of-charge (SoC) range for these systems is 5-90% for NCA/Gr-SiO<sub>x</sub> (i.e., 85% of total) and 5-100% for LFP/Gr (i.e., 95% of total).
